# Supplementary material
Source: publisher figshare collection journal article supplement (https://gsajournals.figshare.com/ndownloader/files/20396946)
Supplement: Supplementary file 1 [file 20396946]

| **Strain** | **Genotype** | **Reference** |
| --- | --- | --- |
| AI187 | *ADE2/ade2 URA5/ura5* *MAT***a**/*MAT*α | (Idnurm 2010) |
| H99 | WT | (Nielsen *et al.* 2003) |
| KN99**a** | WT | (Nielsen *et al.* 2003) |
| GI56 | *RPL22*α*/rpl22***a**Δ*NAT* | This study |
| GI151 | *RPL22*α*/rpl22***a**Δ*NAT* **+** *RPL22***a**-NEO | This study |
| GI102 | *RPL22*α*/rpl22***a**Δ*NAT* **+** *RPL22*α-*NEO* | This study |
| GI154 | *RPL22*α*/rpl22***a**Δ*NAT* **+** *RPL22*α-*NEO* | This study |
| GI104 | *RPL22*α*/rpl22***a**Δ*NAT* **+** empty *NEO* vector | This study |
| GI81 | *RPL22***a***/rpl22*αΔ*NAT* | This study |
| GI86 | *RPL22***a***/rpl22*αΔ*NAT* **+** *RPL22*α-*NEO* | This study |
| GI150 | *RPL22***a***/rpl22*αΔ*NAT* **+** *RPL22***a**-*NEO* | This study |
| GI83 | *RPL22***a***/rpl22*αΔ*NAT* **+**  empty *NEO* vector | This study |
| YFF92 | *rpl22*α::*RPL22***a** *SH2*::*NAT MAT*α | This study |
| YFF113 | *rpl22***a**::*RPL22*αN-*RPL22***a**C *SH2*::*NEO* (*rpl22***a**::c*RPL22*α)  *MAT***a** | This study |
| YFF116 | *rpl22***a**::*RPL22*α *NEO MAT***a** | This study |
| SEC876 | *rpl22***a**::*RPL22*α progeny #7 *MAT***a** | This study |
| SEC884 | *rpl22***a**::*RPL22*α progeny #15 *MAT***a** | This study |
| SEC889 | *rpl22***a**::*RPL22*α progeny #20 *MAT***a** | This study |
| GI228 | 5ʹΔ *RPL22***a**::*NAT MAT***a** | This study |

**Table S1.** Strains used in the present study.

Idnurm, A., 2010 A tetrad analysis of the basidiomycete fungus *Cryptococcus neoformans*. Genetics 185**:** 153–163.

Nielsen, K., G. M. Cox, P. Wang, D. L. Toffaletti, J. R. Perfect *et al.*, 2003 Sexual cycle of *Cryptococcus neoformans* var. *grubii* and virulence of congenic **a** and α isolates. Infect Immun 71**:** 4831-4841.
